# Supplementary material for: Cost-effective preparation of microporous polymers from formamide derivatives and adsorption of CO2 under dry and humid conditions
Source: Royal Society of Chemistry journal article supplement (doi:10.1039/c9py00465c), 2019-01-01
Supplement: c9py00465c1.pdf [file c9py00465c1.pdf]

## Electronic supplementary information

### **Cost-effective preparation of microporous polymers from formamide derivatives and adsorption of CO<sub>2</sub> under dry and humid conditions**

Biao Zhang,<sup>a,b</sup> Jun Yan,<sup>a</sup> Gen Li<sup>a</sup> and Zhonggang Wang<sup>a\*</sup>

<sup>a</sup> *Department of Polymer Science and Materials, School of Chemical Engineering, Dalian University of Technology, Dalian 116024, China*

<sup>b</sup> *Key Laboratory of Low Dimensional Materials and Application Technology of Ministry of Education, School of Materials Science and Engineering, Xiangtan University, Xiangtan 411105, China.*

Email: zgwang@dlut.edu.cn

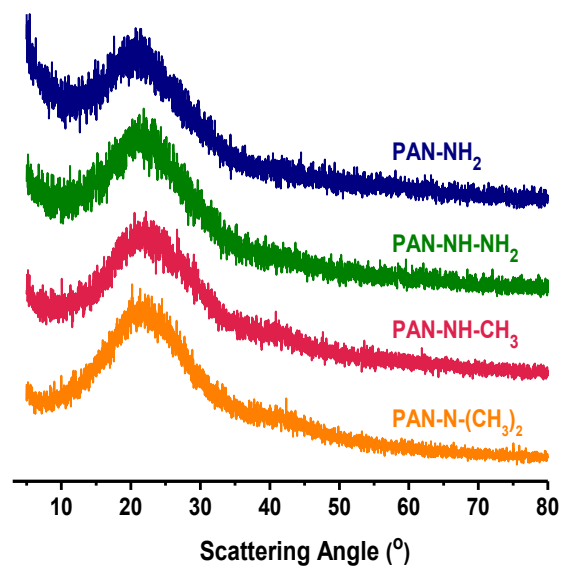

**Fig. S1** Wide angle X-ray diffractions of polyaminals.

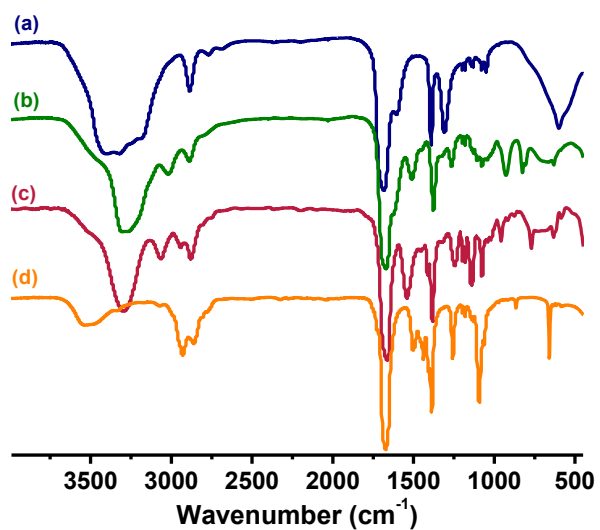

**Fig. S2** FTIR spectra of formamide monomers for (a) formamide, (b) formohydrazide, (c) N-methylformamide and (d) N,N-dimethylformamide.

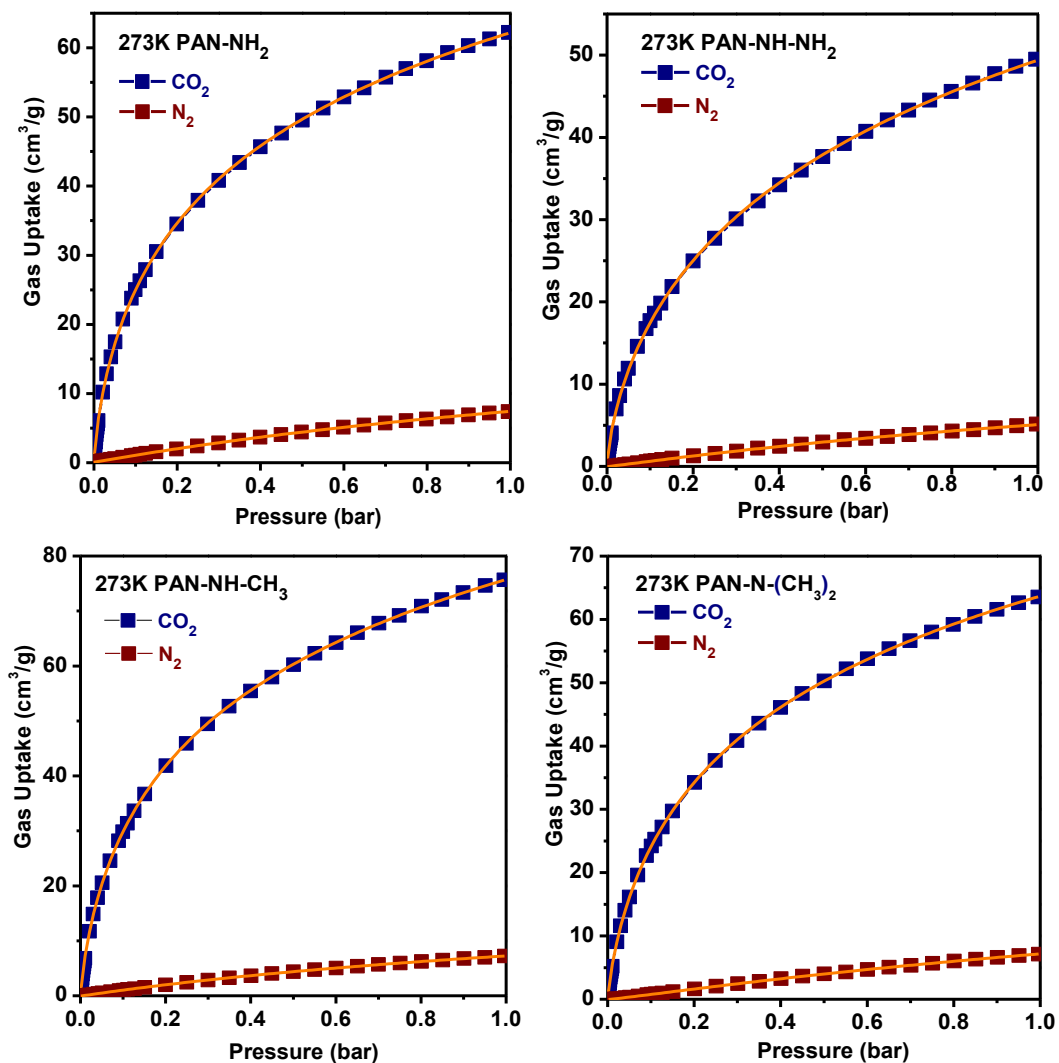

**Fig. S3** Experimental adsorption isotherms for CO<sub>2</sub> and N<sub>2</sub> at 273 K, and their single-site Langmuir-Freundlich fitting curve(solid).

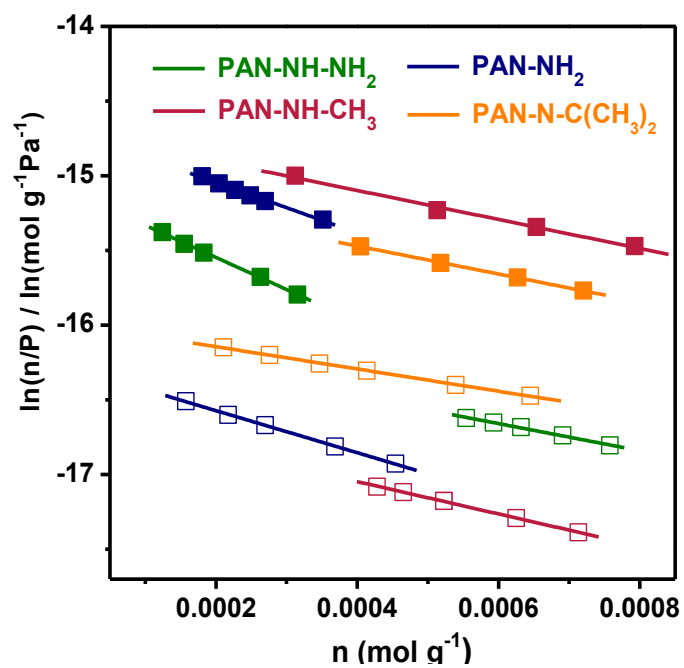

**Fig. 4** Virial plots of CO<sub>2</sub> adsorption in PAN-NH<sub>2</sub>, PAN-NH-NH<sub>2</sub>, PAN-NH-CH<sub>3</sub> and PAN-N-(CH<sub>3</sub>)<sub>2</sub> f at 273 and 298 K.
